# Supplementary material for: Conductometric and Thermodynamic Studies of Selected Imidazolium Chloride Ionic Liquids in N,N-Dimethylformamide at Temperatures from 278.15 to 313.15 K
Source: MDPI journal article supplement (doi:10.3390/molecules29061371), 2024-03-19
Supplement: s1 [file s1]

# Conductometric and Thermodynamic Studies of Selected Imidazolium Chloride Ionic Liquids in N,N-Dimethylformamide at Temperatures from 278.15 to 313.15 K

Zdzisław Kinart\*

University of Lodz, Faculty of Chemistry, Department of Physical Chemistry, 90 – 236  
Lodz, Pomorska 163/165, Poland.  
Correspondence: [zdzislaw.kinart@chemia.uni.lodz.pl](mailto:zdzislaw.kinart@chemia.uni.lodz.pl)

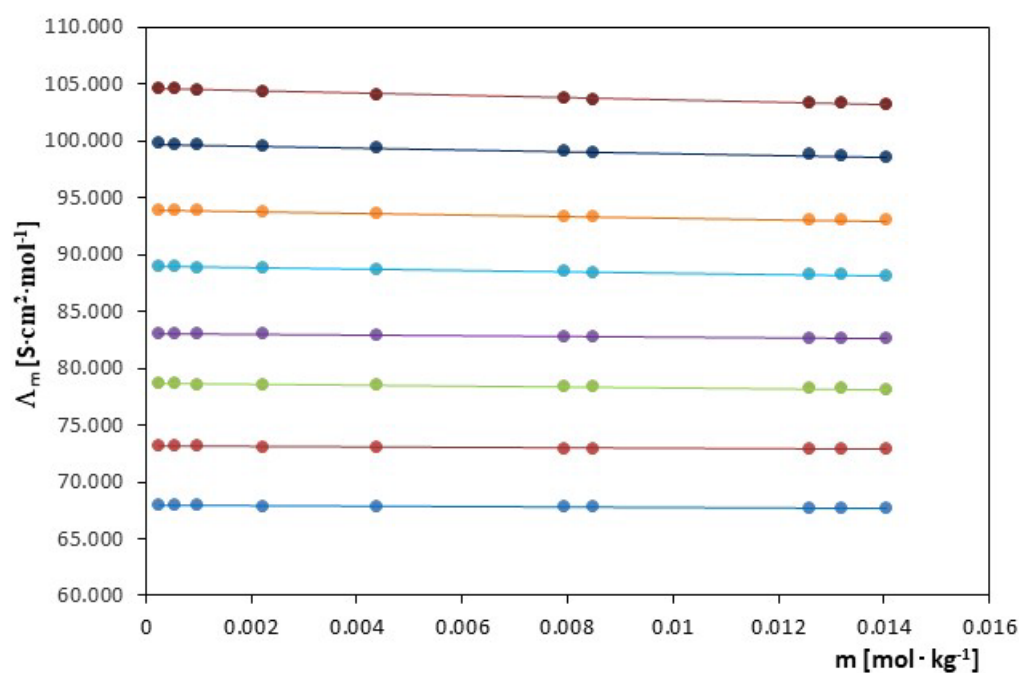

**Figure S1.** Temperature dependence of molar conductances,  $\Lambda_m / S \cdot cm^2 \cdot mol^{-1}$  for  $[mim][Cl]$  in N,N-Dimethylformamide for : (●) 278.15K, (●) 283.15K, (●) 288.15K (●) 293.15K (●) 298.15K, (●) 303.15K, (●) 308.15K and (●) 313.15K

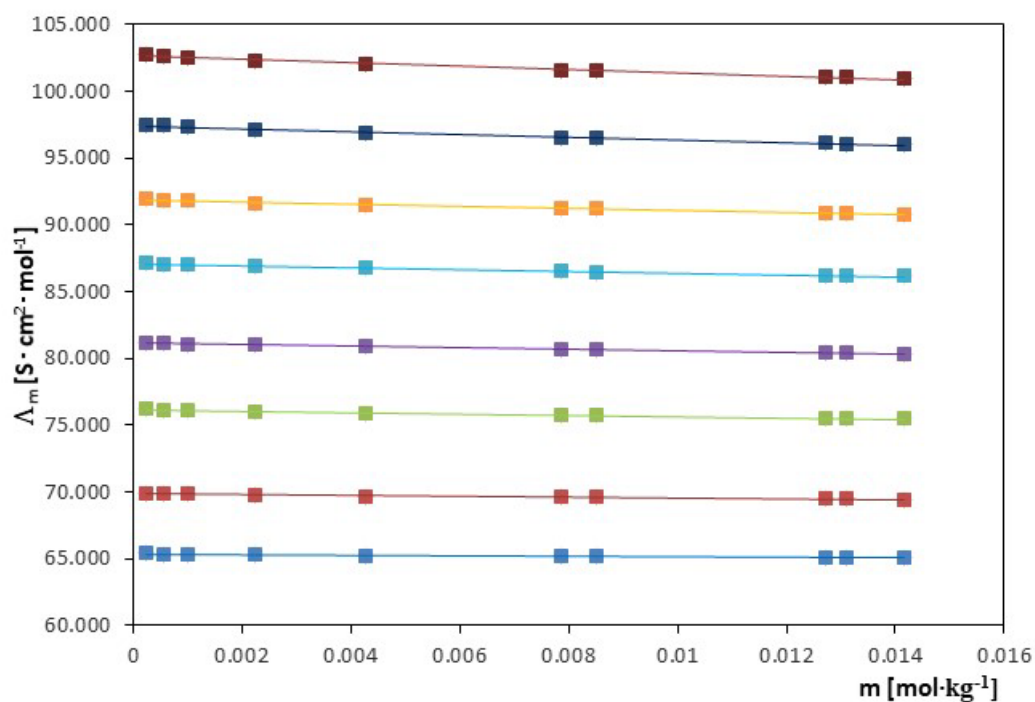

**Figure S2.** Temperature dependence of molar conductances,  $\Lambda_m / S \cdot cm^2 \cdot mol^{-1}$  for  $[femim][Cl]$  in N,N-Dimethylformamide for : (■) 278.15K, (■) 283.15K, (■) 288.15K (■) 293.15K (■) 298.15K, (■) 303.15K, (■) 308.15K and (■) 313.15K

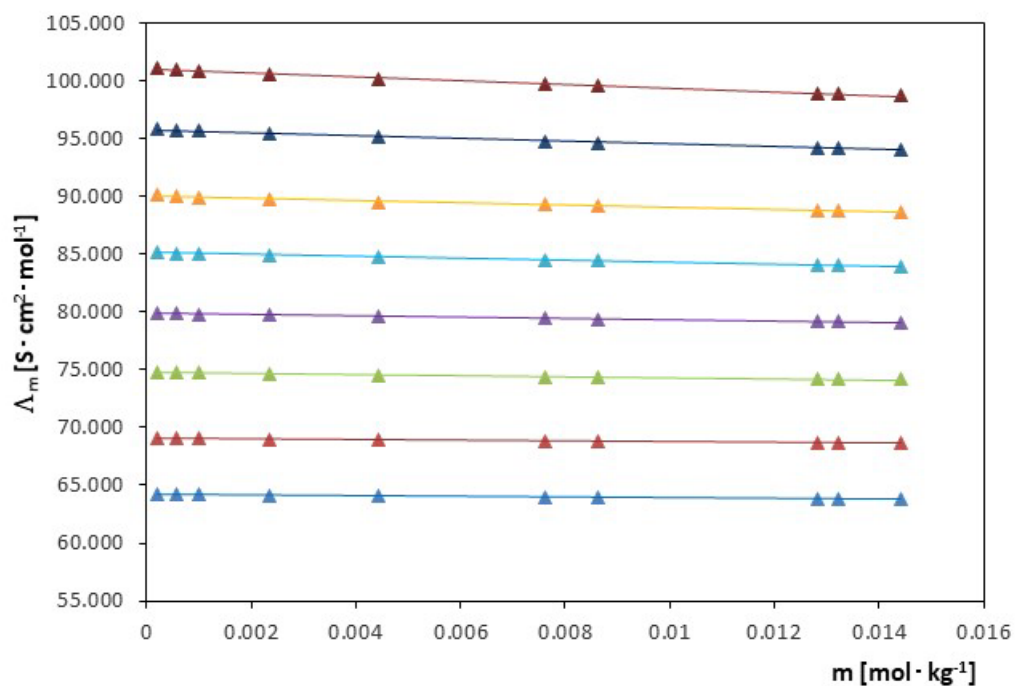

**Figure S3.** Temperature dependence of molar conductances,  $\Lambda_m / S \cdot cm^2 \cdot mol^{-1}$  for  $[bmim][Cl]$  in N,N-Dimethylformamide for: (▲) 278.15K, (▲) 283.15K, (▲) 288.15K (▲) 293.15K (▲) 298.15K, (▲) 303.15K, (▲) 308.15K and (▲) 313.15K

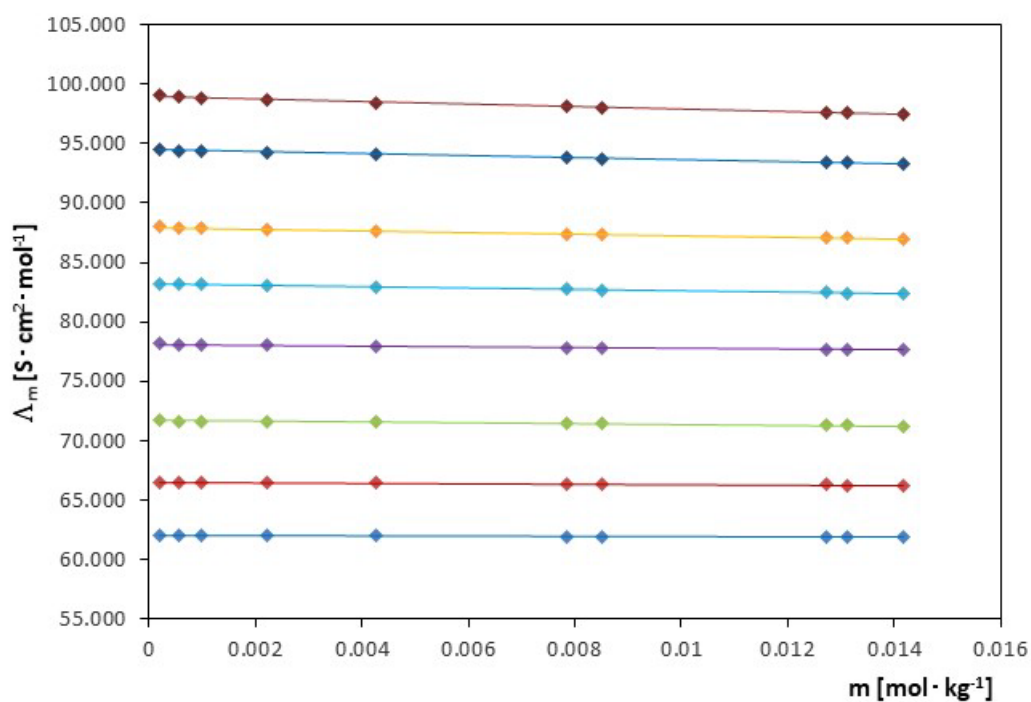

**Figure S4.** Temperature dependence of molar conductances,  $\Lambda_m / S \cdot cm^2 \cdot mol^{-1}$  for  $[hmim][Cl]$  in N,N-Dimethylformamide for : (♦) 278.15K, (♦) 283.15K, (♦) 288.15K (♦) 293.15K (♦) 298.15K, (♦) 303.15K, (♦) 308.15K and (♦) 313.15K K

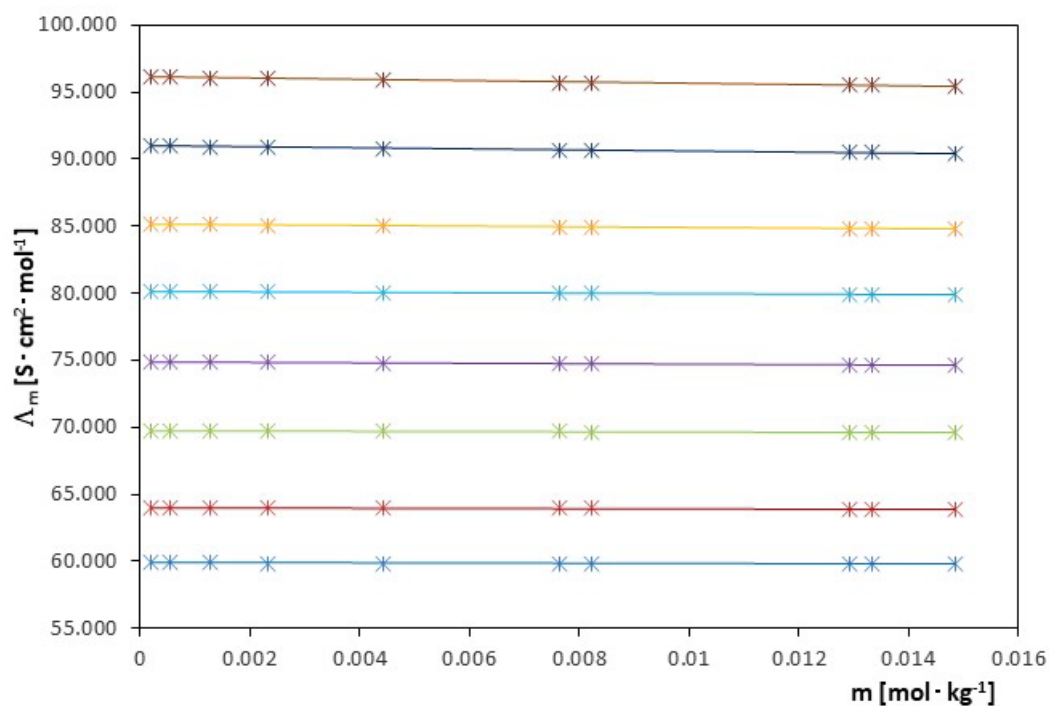

**Figure S5.** Temperature dependence of molar conductances,  $\Lambda_m / S \cdot cm^2 \cdot mol^{-1}$  for  $[omim][Cl]$  in N,N-Dimethylformamide for : (✱) 278.15K, (✱) 283.15K, (✱) 288.15K (✱) 293.15K (✱) 298.15K, (✱) 303.15K, (✱) 308.15K and (✱) 313.15K.
